# Supplementary material
Source: PubMed Central journal article supplement (PMC2773192)
Supplement: supp_122_21_3915__1.pdf [file supp_122_21_3915__1.pdf]

**Table S1.** Values of the slopes obtained from the linear regressions and the  $R^2$  values for control and FSK-treated cases

| Control    |                           |       |
|------------|---------------------------|-------|
| Trajectory | Slope ( $\mu\text{m/s}$ ) | $R^2$ |
| 1          | 0.097                     | 0.967 |
| 2          | 0.052                     | 0.988 |
| 3          | 0.043                     | 0.987 |
| 4          | 0.067                     | 0.988 |
| 5          | 0.071                     | 0.915 |
| 6          | 0.139                     | 0.985 |
| 7          | 0.116                     | 0.977 |
| 8          | 0.059                     | 0.995 |
| 9          | 0.097                     | 0.993 |
|            |                           |       |
| Mean       | 0.082                     |       |
| s.d.       | 0.032                     |       |

| FSK        |                           |       |
|------------|---------------------------|-------|
| Trajectory | Slope ( $\mu\text{m/s}$ ) | $R^2$ |
| 1          | 0.249                     | 0.914 |
| 2          | 0.09                      | 0.969 |
| 3          | 0.156                     | 0.966 |
| 4          | 0.13                      | 0.994 |
| 5          | 0.159                     | 0.982 |
| 6          | 0.128                     | 0.961 |
| 7          | 0.165                     | 0.88  |
| 8          | 0.127                     | 0.98  |
| 9          | 0.171                     | 0.994 |
|            |                           |       |
| Mean       | 0.153                     |       |
| s.d.       | 0.044                     |       |

| Group   | Mean  | s.d.  | $n$ | df | $t^*$    | $P$                  |
|---------|-------|-------|-----|----|----------|----------------------|
| Control | 0.082 | 0.032 | 9   | 8  | 3.887336 | 0.0025 > $P$ > 0.001 |
| FSK     | 0.153 | 0.044 | 9   |    |          |                      |
