# Supplementary material
Source: PubMed Central journal article supplement (PMC2773192)
Supplement: supp_122_21_3915__2.pdf [file supp_122_21_3915__2.pdf]

**Table S2.** Values of the slopes obtained from the linear regressions and the  $R^2$  values for DN-MyoVa cells in control and FSK-treated cases

| Control DN-MyoVa |                           |       |
|------------------|---------------------------|-------|
| Trajectory       | Slope ( $\mu\text{m/s}$ ) | $R^2$ |
| 1                | 0.159                     | 0.989 |
| 2                | 0.128                     | 0.985 |
| 3                | 0.097                     | 0.954 |
| 4                | 0.218                     | 0.943 |
| 5                | 0.081                     | 0.95  |
| 6                | 0.224                     | 0.988 |
| 7                | 0.126                     | 0.921 |
| 8                | 0.195                     | 0.946 |
| 9                | 0.259                     | 0.944 |
| 10               | 0.158                     | 0.848 |
|                  |                           |       |
| Mean             | 0.165                     |       |
| s.d.             | 0.058                     |       |

| FSK DN-MyoVa |                           |       |
|--------------|---------------------------|-------|
| Trajectory   | Slope ( $\mu\text{m/s}$ ) | $R^2$ |
| 1            | 0.094                     | 0.967 |
| 2            | 0.182                     | 0.957 |
| 3            | 0.14                      | 0.955 |
| 4            | 0.21                      | 0.978 |
| 5            | 0.115                     | 0.963 |
| 6            | 0.181                     | 0.991 |
| 7            | 0.112                     | 0.958 |
| 8            | 0.15                      | 0.948 |
| 9            | 0.184                     | 0.984 |
| 10           | 0.101                     | 0.841 |
|              |                           |       |
| Mean         | 0.147                     |       |
| s.d.         | 0.041                     |       |

| Group             | Mean   | s.d.  | n  | df | $t^*$    | $P$              |
|-------------------|--------|-------|----|----|----------|------------------|
| Miosin VA Control | 0.1645 | 0.058 | 10 | 9  | 0.781674 | $0.25 > P > 0.2$ |
| Miosin VA FSK     | 0.1469 | 0.041 | 10 |    |          |                  |
