# Supplementary material
Source: PubMed Central journal article supplement (PMC2773192)
Supplement: supp_122_21_3915__3.pdf [file supp_122_21_3915__3.pdf]

**Table S3.** Values of the slopes obtained from the linear regressions and  $R^2$  values for DN-MyoVc cells in control and FSK-treated cases

| MVC Control |                           |       |
|-------------|---------------------------|-------|
| Trajectory  | Slope ( $\mu\text{m/s}$ ) | $R^2$ |
| 1           | 0.105                     | 0.971 |
| 2           | 0.063                     | 0.991 |
| 3           | 0.047                     | 0.992 |
| 4           | 0.076                     | 0.97  |
| 5           | 0.088                     | 0.973 |
| 6           | 0.144                     | 0.956 |
| 7           | 0.144                     | 0.965 |
| 8           | 0.059                     | 0.987 |
| 9           | 0.054                     | 0.951 |
|             |                           |       |
| Mean        | 0.087                     |       |
| s.d.        | 0.037                     |       |

| MVC FSK    |                           |       |
|------------|---------------------------|-------|
| Trajectory | Slope ( $\mu\text{m/s}$ ) | $R^2$ |
| 1          | 0.104                     | 0.972 |
| 2          | 0.115                     | 0.939 |
| 3          | 0.057                     | 0.937 |
| 4          | 0.266                     | 0.996 |
| 5          | 0.301                     | 0.899 |
| 6          | 0.253                     | 0.912 |
| 7          | 0.173                     | 0.885 |
| 8          | 0.081                     | 0.98  |
| 9          | 0.108                     | 0.981 |
|            |                           |       |
| Mean       | 0.162                     |       |
| s.d.       | 0.090                     |       |

| Group       | Mean   | s.d.  | $n$ | df | $t^*$    | $P$                |
|-------------|--------|-------|-----|----|----------|--------------------|
| MVC Control | 0.0867 | 0.037 | 9   | 8  | 2.323694 | $0.025 > P > 0.02$ |
| MVC FSK     | 0.162  | 0.090 | 9   |    |          |                    |
