# Supplementary material
Source: PubMed Central journal article supplement (PMC2773192)
Supplement: supp_122_21_3915__4.pdf [file supp_122_21_3915__4.pdf]

**Table S4.** Values of the slopes obtained from the linear regressions and  $R^2$  values for control and nocodazole-treated cases

| Control    |                                       |       |
|------------|---------------------------------------|-------|
| Trajectory | Slope ( $\mu\text{m}/\text{second}$ ) | $R^2$ |
| 1          | 0.103                                 | 0.987 |
| 2          | 0.1                                   | 0.962 |
| 3          | 0.063                                 | 0.984 |
| 4          | 0.083                                 | 0.997 |
| 5          | 0.088                                 | 0.957 |
| 6          | 0.062                                 | 0.983 |
| 7          | 0.038                                 | 0.861 |
| 8          | 0.084                                 | 0.93  |
| 9          | 0.082                                 | 0.974 |
| 10         | 0.056                                 | 0.987 |
| 11         | 0.05                                  | 0.976 |
| 12         | 0.113                                 | 0.905 |
| 13         | 0.086                                 | 0.926 |
| 14         | 0.049                                 | 0.991 |
| 15         | 0.106                                 | 0.956 |
|            |                                       |       |
| Mean       | 0.078                                 |       |
| s.d.       | 0.023                                 |       |

| Nocodazole |                                       |       |
|------------|---------------------------------------|-------|
| Trajectory | Slope ( $\mu\text{m}/\text{second}$ ) | $R^2$ |
| 1          | 0.021                                 | 0.977 |
| 2          | 0.019                                 | 0.996 |
| 3          | 0.031                                 | 0.99  |
| 4          | 0.019                                 | 0.981 |
| 5          | 0.024                                 | 0.992 |
| 6          | 0.02                                  | 0.992 |
| 7          | 0.011                                 | 0.982 |
| 8          | 0.007                                 | 0.962 |
| 9          | 0.012                                 | 0.953 |
| 10         | 0.007                                 | 0.992 |
| 11         | 0.013                                 | 0.987 |
| 12         | 0.013                                 | 0.986 |
| 13         | 0.013                                 | 0.989 |
| 14         | 0.015                                 | 0.916 |
| 15         | 0.01                                  | 0.994 |
|            |                                       |       |
| Mean       | 0.016                                 |       |
| s.d.       | 0.007                                 |       |

| Group      | Mean  | s.d.  | <i>n</i> | df | <i>t</i> * | <i>P</i>         |
|------------|-------|-------|----------|----|------------|------------------|
| Control    | 0.078 | 0.023 | 15       | 14 | 9.928981   | <i>P</i> <0.0005 |
| Nocodazole | 0.016 | 0.007 | 15       | 14 |            |                  |
