# Supplementary material
Source: PubMed Central journal article supplement (PMC2773192)
Supplement: supp_122_21_3915__5.pdf [file supp_122_21_3915__5.pdf]

**Table S5.** Values of the slopes obtained from the linear regressions and  $R^2$  values for the control and cytochalasin-D-treated cases

| Control    |                                       |       | Cytochalasin D |                                       |        |
|------------|---------------------------------------|-------|----------------|---------------------------------------|--------|
| Trajectory | Slope ( $\mu\text{m}/\text{second}$ ) | $R^2$ | Trajectory     | Slope ( $\mu\text{m}/\text{second}$ ) | $R^2$  |
| 1          | 0.103                                 | 0.987 | 1              | 0.1156                                | 0.9166 |
| 2          | 0.1                                   | 0.962 | 2              | 0.0835                                | 0.9689 |
| 3          | 0.063                                 | 0.984 | 3              | 0.1057                                | 0.8541 |
| 4          | 0.083                                 | 0.997 | 4              | 0.0604                                | 0.9511 |
| 5          | 0.088                                 | 0.957 | 5              | 0.0948                                | 0.9519 |
| 6          | 0.062                                 | 0.983 | 6              | 0.1462                                | 0.5259 |
| 7          | 0.038                                 | 0.861 | 7              | 0.1906                                | 0.8485 |
| 8          | 0.084                                 | 0.93  | 8              | 0.0477                                | 0.9035 |
| 9          | 0.082                                 | 0.974 | 9              | 0.1055                                | 0.9799 |
| 10         | 0.056                                 | 0.987 | 10             | 0.0909                                | 0.952  |
| 11         | 0.05                                  | 0.976 | 11             | 0.2122                                | 0.9872 |
| 12         | 0.113                                 | 0.905 | 12             | 0.0879                                | 0.9274 |
| 13         | 0.086                                 | 0.926 | 13             | 0.0955                                | 0.9724 |
| 14         | 0.049                                 | 0.991 | 14             | 0.1429                                | 0.8929 |
| 15         | 0.106                                 | 0.956 | 15             | 0.1627                                | 0.9302 |
|            |                                       |       |                |                                       |        |
| Mean       | 0.078                                 |       | Mean           | 0.116                                 |        |
| s.d.       | 0.023                                 |       | s.d.           | 0.046                                 |        |

| Group   | Mean  | s.d.  | $n$ | df | $t^*$    | $P$   |
|---------|-------|-------|-----|----|----------|-------|
| Control | 0.076 | 0.023 | 15  | 14 | 2.889063 | 0.006 |
| Cyt D   | 0.116 | 0.046 | 15  |    |          |       |
