# Supplementary material
Source: PubMed Central journal article supplement (PMC2773192)
Supplement: supp_122_21_3915__6.pdf [file supp_122_21_3915__6.pdf]

**Table S6.** Values of the slopes obtained from the linear regressions and  $R^2$  values for the Myosin Va shRNA- and Myosin Vc shRNA-transfected cells.

| MyoVa shRNA |                           |       |
|-------------|---------------------------|-------|
| Trajectory  | Slope ( $\mu\text{m/s}$ ) | $R^2$ |
| 1           | 0.1                       | 0.95  |
| 2           | 0.14                      | 0.98  |
| 3           | 0.16                      | 0.98  |
| 4           | 0.13                      | 0.97  |
| 5           | 0.1                       | 0.97  |
| 6           | 0.11                      | 0.95  |
| 7           | 0.15                      | 0.94  |
| 8           | 0.14                      | 0.99  |
| 9           | 0.1                       | 0.97  |
| 10          | 0.15                      | 0.98  |
| 11          | 0.12                      | 0.89  |
| 12          | 0.13                      | 0.95  |
| 13          | 0.12                      | 0.86  |
| 14          | 0.12                      | 0.97  |
| 15          | 0.13                      | 0.99  |
| 16          | 0.12                      | 0.97  |
| 17          | 0.21                      | 0.96  |
| Mean        | 0.13                      |       |
| s.d.        | 0.03                      |       |

| MyoVc shRNA |                           |       |
|-------------|---------------------------|-------|
| Trajectory  | Slope ( $\mu\text{m/s}$ ) | $R^2$ |
| 1           | 0.04                      | 0.94  |
| 2           | 0.09                      | 0.98  |
| 3           | 0.08                      | 0.97  |
| 4           | 0.08                      | 0.98  |
| 5           | 0.09                      | 0.95  |
| 6           | 0.07                      | 0.98  |
| 7           | 0.08                      | 0.98  |
| 8           | 0.04                      | 0.99  |
| 9           | 0.07                      | 0.98  |
| 10          | 0.05                      | 0.99  |
| 11          | 0.07                      | 0.98  |
| 12          | 0.08                      | 0.97  |
| 13          | 0.05                      | 0.97  |
| 14          | 0.06                      | 0.98  |
| 15          | 0.1                       | 0.93  |
| 16          | 0.06                      | 0.99  |
| 17          | 0.09                      | 0.96  |
| Mean        | 0.07                      |       |
| s.d.        | 0.02                      |       |

| Group       | Mean | s.d. | $n$ | df | $t^*$ | $P$          |
|-------------|------|------|-----|----|-------|--------------|
| MyoVa shRNA | 0.13 | 0.03 | 17  | 16 | 7.55  | $P < 0.0001$ |
| MyoVc shRNA | 0.07 | 0.02 | 17  |    |       |              |
