# Supplementary material
Source: PubMed Central journal article supplement (PMC2773192)
Supplement: supp_122_21_3915__7.pdf [file supp_122_21_3915__7.pdf]

**Table S7.** Primers used for PCR amplification of myosin-V isoforms.

|                  | <b>Primer sequences (5' _3')</b>                                                 | <b>GenBank ID</b> | <b>Size (bp)</b> |
|------------------|----------------------------------------------------------------------------------|-------------------|------------------|
| Human myosin-Va  | forward:<br>5'-AGTTCAGTCGCCTGGAAGAA-3'<br>reverse:<br>5'-GCACTTTTCTCACTGAGGGC-3' | NM_000259         | 451              |
| Human myosin- Vb | forward:<br>5-'TTCATGAGCCTGCAGTTTTG-3'<br>reverse:<br>5'-TCTGCCTGGAAGACCACTCT-3' | AY274809          | 523              |
| Human myosin-Vc  | forward:<br>5'-CCCAGCAGTTTCAAGCTAGG-3'<br>reverse:<br>5'-GCAAGAGAACTTTTGGCAGG-3' | NM_018728         | 517              |
| GAPDH            | forward:<br>5'-ACCACAGTCCATGCCATCAC-3'<br>reverse:<br>5'-TCCACCACCCTGTTGCTGTA-3' | BC064681          | 452              |
